# Supplementary material
Source: publisher site journal article supplement (https://www.dovepress.com/article/218367)
Supplement: Supplementary file 1 [file get_supplementary_file.php]

1 Supplementary data

2 Table S1

3 Original German technical terms and their translations used in this publication

| German original             | English                    |
|-----------------------------|----------------------------|
| Computer                    | Computer                   |
| Telepräsenzsystem           | telepresence system        |
| Smartphone                  | smartphone                 |
| Tablet                      | tablet                     |
| Smartwatch                  | smartwatch                 |
| Fitness-Armband             | activity tracker           |
| Datenbrille                 | data glasses               |
| Digitalisierungstift        | digital pen                |
| Spielekonsolen              | gaming console             |
| Virtual Reality Technologie | virtual reality technology |

1 Table S2

2 Professional and personal use and procurement

|                            | Already using (%) |              | Planning to buy (%) |              | Can imagine buying (%) |              | unknown (%) | No point (%) |
|----------------------------|-------------------|--------------|---------------------|--------------|------------------------|--------------|-------------|--------------|
|                            | personal          | professional | personal            | professional | personal               | professional |             |              |
| Computer                   | 96                | 100          | 0                   | 0            | 0                      | 0            | 0           | 0            |
| Telepresence               | 8                 | 7            | 0                   | 1            | 2                      | 10           | 30          | 14           |
| Smartphone                 | 87                | 62           | 2                   | 0            | 2                      | 2            | 1           | 4            |
| Tablet                     | 66                | 28           | 2                   | 2            | 6                      | 10           | 2           | 12           |
| Smartwatch                 | 11                | 3            | 1                   | 0            | 7                      | 3            | 9           | 46           |
| Activity tracker           | 20                | 1            | 2                   | 0            | 7                      | 2            | 4           | 47           |
| Data glasses               | 1                 | 1            | 0                   | 0            | 2                      | 3            | 20          | 51           |
| Digital pen                | 4                 | 2            | 0                   | 0            | 3                      | 12           | 28          | 31           |
| Gaming console             | 15                | 1            | 0                   | 0            | 2                      | 1            | 4           | 54           |
| Virtual reality technology | 5                 | 1            | 0                   | 0            | 6                      | 4            | 28          | 35           |

3 Values rounded to integer

1 Table S3

2 Experience of technical solutions for supporting patients

| Areas of the new care dependency definition in the German Social Code Book XI        | Recommended to patients (%) | Already used by patients (%) |
|--------------------------------------------------------------------------------------|-----------------------------|------------------------------|
| Mobility (mobilization bed)                                                          | 9                           | 26                           |
| Communication (videophone)                                                           | 8                           | 9                            |
| Safety (emergency call system)                                                       | 54                          | 77                           |
| Self-sufficiency (height-adjustable washbasin)                                       | 9                           | 12                           |
| Management of requirements relating to illness and/or therapy (medication dispenser) | 10                          | 15                           |
| Organization of day-to-day life (smart calendar)                                     | 13                          | 17                           |
| 3 Values rounded to integer                                                          |                             |                              |
